# Supplementary material for: Oral microbiome in HIV-associated periodontitis
Source: PubMed Central journal article supplement — Medicine (Baltimore). 2017 Mar 24;96(12):e5821. doi: 10.1097/MD.0000000000005821 (PMC5371436; doi:10.1097/md.0000000000005821), 2017-03-24
Supplement: medi-96-e5821-s001.pdf [file medi-96-e5821-s001.pdf]

**Table S1a.** Participant characteristics at baseline. <sup>a</sup>CD4 T-Cell Counts available for HIV+ participants only.

|                                           | Total(n=50)        | HIV+<br>n=40    | HIV-<br>N=10    | Fisher |
|-------------------------------------------|--------------------|-----------------|-----------------|--------|
| <b>Periodontal disease</b>                |                    |                 |                 | 0.297  |
| MILD_NONE                                 | 18                 | 12              | 6               |        |
| MODERATE                                  | 16                 | 14              | 2               |        |
| SEVERE                                    | 16                 | 14              | 2               |        |
| <b>Gender</b>                             |                    |                 |                 | 0.002  |
| Male                                      | 32                 | 30              | 2               |        |
| Female                                    | 17                 | 9               | 8               |        |
| Trans                                     | 1                  | 1               | 0               |        |
| <b>Current Alcohol Use</b>                |                    |                 |                 | 1      |
| No                                        | 24                 | 19              | 5               |        |
| Yes                                       | 26                 | 21              | 5               |        |
| <b>Ethnic Group</b>                       |                    |                 |                 | 0.552  |
| 0                                         | 34                 | 27              | 7               |        |
| 3                                         | 13                 | 11              | 2               |        |
| Other                                     | 3                  | 2               | 1               |        |
| <b>Sexual Behaviors</b>                   |                    |                 |                 | 0.002  |
| Bisexual                                  | 5                  | 5               | 0               |        |
| Heterosexual                              | 24                 | 14              | 10              |        |
| MSM                                       | 20                 | 20              | 0               |        |
| Trans                                     | 1                  | 1               | 0               |        |
| <b>Eat Candy</b>                          |                    |                 |                 | 0.173  |
| No                                        | 9                  | 9               | 0               |        |
| Yes                                       | 40                 | 30              | 10              |        |
| <b>Drink Soda</b>                         |                    |                 |                 | 1      |
| No                                        | 19                 | 15              | 4               |        |
| Yes                                       | 31                 | 25              | 6               |        |
| <b>SmokeTobacco</b>                       |                    |                 |                 | 0.717  |
| No                                        | 33                 | 27              | 6               |        |
| Yes                                       | 17                 | 13              | 4               |        |
| <b>FinancialStatus</b>                    |                    |                 |                 | 0.456  |
| 0                                         | 30                 | 24              | 6               |        |
| 1                                         | 11                 | 10              | 1               |        |
| 2                                         | 6                  | 4               | 2               |        |
| 3                                         | 3                  | 2               | 1               |        |
| <b>Brush Teeth</b>                        |                    |                 |                 | 1      |
| No                                        | 2                  | 2               | 0               |        |
| Yes                                       | 48                 | 38              | 10              |        |
| <b>Floss Teeth</b>                        |                    |                 |                 | 0.462  |
| No                                        | 15                 | 11              | 4               |        |
| Yes                                       | 35                 | 29              | 6               |        |
| <b>Saliva pH</b>                          |                    |                 |                 | 0.484  |
| Blue (>6, high)                           | 37                 | 30              | 7               |        |
| Green (4.5-5.5,                           | 9                  | 7               | 2               |        |
| Yellow (< 4.0, low)                       | 2                  | 1               | 1               |        |
| <b>Age</b>                                |                    |                 |                 | 0.005  |
|                                           | 45.3(37.0,53.0)    | 47.6(40.4,54.8) | 36.1(28.3,42.2) |        |
| <b>CD4 T-Cell Counts (PD)<sup>a</sup></b> |                    |                 |                 |        |
| MILD_NONE                                 | 578.2(396.5,789.0) |                 | N/A             |        |
| MODERATE                                  | 362.7(284.0,473.2) |                 | N/A             |        |
| # SEVERE                                  | 351.9(243.5,424.2) |                 | N/A             |        |

**Table S1b.** Summary of Oral Examination results for HIV+/- participants stratified by severity of Periodontal Disease.

|                                                   | <b>HIV+<br/>N-PD</b> | <b>HIV+,<br/>M/S-PD</b> |                | <b>HIV-<br/>N-PD</b> | <b>HIV-<br/>M/S-PD</b> |                |
|---------------------------------------------------|----------------------|-------------------------|----------------|----------------------|------------------------|----------------|
|                                                   | (N=13)               | (N=27)                  | <i>p value</i> | (N=6)                | (N=4)                  | <i>p value</i> |
| <b>Salivary flow<sup>a</sup></b>                  | 2.29+/-1.43          | 2.11+/-1.15             | 0.68           | 1.53+/-0.86          | 1.02+/-0.82            | 0.38           |
| <b>Missing, decayed, Filled teeth<sup>a</sup></b> | 6.72+/-4.41          | 6.32+/-2.65             | 0.73           | 4.8+/-3.2            | 10.5+/-6.45            | 0.1            |
| <b>Buffering Capacity<sup>b</sup></b>             |                      |                         |                |                      |                        |                |
| <b>HIGH</b>                                       | 11(.92)              | 19(.73)                 | 0.20           | 5(.83)               | 2(.5)                  | 0.28           |
| <b>INTERMEDIATE_LOW</b>                           | 1(.08)               | 7(.27)                  |                | 1(.17)               | 2(.5)                  |                |

#

Standard deviation values in parentheses. Statistics obtained from Student's t-test<sup>a</sup> or Exact Wilcoxon's<sup>b</sup> two sample test

**Table S1c.** Summary of VL, CD4+ T-Cell counts and ART treatment information for HIV infected patients.

|      | PD Group | Viral Load <sup>a</sup> | CD4+ T-Cell Counts | ART               |
|------|----------|-------------------------|--------------------|-------------------|
| A001 | S-PD     | 99                      | 166                | TDF+FTC+AZT+ATV/r |
| A002 | S-PD     | Und                     | 506                | TDF+DDI+EFV       |
| A003 | S-PD     | Und                     | 233                | AZT+3TC+EFV       |
| A004 | S-PD     | 1290                    | 175                | TDF+FTC+LPV/r     |
| A005 | S-PD     | Und                     | 401                | 3TC+AZT+ABC       |
| A006 | M-PD     | Und                     | 115                | TDF+FTC+RAL       |
| A007 | M-PD     | Und                     | 618                | ABC+3TC+DRV/r     |
| A008 | S-PD     | Und                     | 693                | ABC+3TC+ATV/r     |
| A009 | S-PD     | Und                     | 223                | TDF+FTC+ATV/r     |
| A010 | S-PD     | Und                     | 432                | 3TC+AZT+NFV       |
| A011 | S-PD     | 670                     | 199                | TDF+FTC+ETR+DRV/r |
| A012 | S-PD     | Und                     | 915                | EFV+FTC+TDF       |
| A013 | M-PD     | Und                     | 333                | EFV+FTC+TDF       |
| A014 | M-PD     | Und                     | 226                | TDF+FTC+RAL       |
| A015 | S-PD     | >500000                 | 135                | NAIVE             |
| A016 | S-PD     | 230                     | 401                | TDF+FTC+ATV/r     |
| A017 | M-PD     | 3100                    | 493                | AZT+3TC+LPV/r     |
| A018 | S-PD     | 3260                    | 194                | TDF+FTC+ATV/r     |
| A019 | M-PD     | Und                     | 285                | ABC+3TC+LPV/r     |
| A020 | M-PD     | Und                     | 259                | TDF+FTC+ATV/r     |
| B001 | S-PD     | Und                     | 254                | TDF+FTC+EFV       |
| B002 | M-PD     | Und                     | 141                | TDF+FTC+LPV/r+RAL |
| B003 | M-PD     | Und                     | 414                | TDF+FTC+ATV/r     |
| B004 | M-PD     | Und                     | 130                | FTC+TDF+ATV/r+RAL |
| B005 | N-PD     | Und                     | 444                | TDF+FTC+EFV       |
| B006 | N-PD     | 8860                    | 840                | N/A <sup>b</sup>  |
| B007 | M-PD     | Und                     | 218                | TDF+FTC+EFV       |
| B008 | M-PD     | Und                     | 514                | ABC/3TC+TDF+RAL   |
| B009 | N-PD     | Und                     | 248                | TDF+FTC+DRV/r     |
| B010 | N-PD     | Und                     | 772                | TDF+FTC+ATV/r     |
| B011 | N-PD     | Und                     | 544                | TDF+FTC+EFV       |
| B012 | N-PD     | Und                     | 601                | ABC+3TC+LPV/r     |
| B013 | N-PD     | Und                     | 469                | TDF+FTC+ATV/r     |
| B014 | N-PD     | Und                     | 845                | TDF+FTC+LPV/r     |
| B015 | M-PD     | Und                     | 1049               | TDF+FTC+EFV       |
| B016 | N-PD     | Und                     | 202                | TDF+FTC+EFV       |
| B017 | N-PD     | Und                     | 254                | TDF+FTC+ATV/r     |
| B018 | M-PD     | Und                     | 283                | TDF+FTC+EFV       |
| B019 | N-PD     | Und                     | 700                | N/A <sup>b</sup>  |
| B020 | N-PD     | Und                     | 1020               | FTC+TDF+EFV       |

#

<sup>a</sup>Und: Undetectable Viral Load; <sup>b</sup>N/A: Data not available

**Table S2.** Phylum level changes by HIV infection (HIV+ versus HIV-) and by moderate (M-PD) versus severe PD (S-PD). Only differences with p.adj<0.1 are shown; N/S: not significant; log2FC (A vs B) refers to log<sub>2</sub>(A/B).#

| Global        |                       | baseMean | HIV+ vs HIV- |        | PD(SPD vs NPD) |        |
|---------------|-----------------------|----------|--------------|--------|----------------|--------|
|               |                       |          | log2FC       | padj   | log2FC         | padj   |
|               | <i>Proteobacteria</i> | 2238.9   | 1.18         | <0.001 | -0.45          | <0.1   |
|               | <i>Actinobacteria</i> | 3311.1   | 0.68         | <0.005 | N/S            | N/S    |
|               | <i>Firmicutes</i>     | 12225.5  | N/S          | N/S    | -0.88          | <0.001 |
|               | <i>Synergistetes</i>  | 40.2     | N/S          | N/S    | 1.72           | <0.001 |
|               | <i>Spirochaetae</i>   | 32.6     | N/S          | N/S    | 1.18           | <0.001 |
|               | <i>Actinobacteria</i> | 3311.1   | N/S          | N/S    | -0.49          | <0.1   |
|               | <i>Chloroflexi</i>    | 0.4      | N/S          | N/S    | 1.32           | <0.1   |
| <b>Teeth</b>  |                       |          |              |        |                |        |
|               | <i>Proteobacteria</i> | 1853.3   | 1.24         | <0.005 | N/S            | N/S    |
|               | <i>Synergistetes</i>  | 67.1     | N/S          | N/S    | 1.34           | <0.1   |
| <b>Cheek</b>  |                       |          |              |        |                |        |
|               | <i>Proteobacteria</i> | 2580.9   | 1.04         | <0.005 | -1.03          | <0.005 |
|               | <i>Actinobacteria</i> | 1859.6   | 0.59         | <0.01  | -0.72          | <0.05  |
|               | <i>Firmicutes</i>     | 14791.4  | N/S          | N/S    | -1.21          | <0.001 |
|               | <i>Synergistetes</i>  | 25.5     | N/S          | N/S    | 2.14           | <0.001 |
|               | <i>Spirochaetae</i>   | 23.5     | N/S          | N/S    | 1.73           | <0.005 |
|               | <i>CD_TM7</i>         | 55.7     | N/S          | N/S    | 1.00           | <0.05  |
| <b>Saliva</b> |                       |          |              |        |                |        |
|               | <i>Spirochaetae</i>   | 26.2     | N/S          | N/S    | 2.41           | <0.001 |
|               | <i>Synergistetes</i>  | 16.8     | N/S          | N/S    | 1.91           | <0.05  |
|               | <i>Fusobacteria</i>   | 1161.4   | N/S          | N/S    | -0.91          | <0.05  |
|               | <i>Proteobacteria</i> | 1503.6   | N/S          | N/S    | -1.02          | <0.1   |
|               | <i>Firmicutes</i>     | 12949.0  | N/S          | N/S    | -0.64          | <0.1   |

#

**Table S3.** Genus level significant changes in abundance associated with HIV infection (HIV+) stratified by severity of PD. Only differences with p.adj<0.1 and baseMean>100 are shown; log2FC (A vs B) refers to log<sub>2</sub>(A/B).#

| HIV+ vs HIV-                 |          |        |        |
|------------------------------|----------|--------|--------|
| Mild_None PD                 | baseMean | log2FC | padj   |
| <b>Uncl. Neisseriaceae</b>   | 148.96   | 1.96   | <0.001 |
| <i>Uncl. Veillonellaceae</i> | 131.16   | -1.49  | <0.05  |
| <i>Selenomonas</i>           | 174.14   | -1.35  | <0.1   |
| <i>Streptococcus</i>         | 5360.23  | 0.86   | <0.1   |
| Moderate/Severe PD           |          |        |        |
| <i>Kingella</i>              | 102.73   | 2.21   | <0.005 |
| <b>Neisseria</b>             | 262.42   | 1.99   | <0.005 |
| <i>Leptotrichia</i>          | 673.22   | -1.43  | <0.005 |
| <i>Uncl.</i>                 |          |        |        |
| <i>Planococcaceae</i>        | 0.37     | 3.25   | <0.05  |
| <i>Rothia</i>                | 1034.61  | 1.31   | <0.05  |
| <i>Centipeda</i>             | 226.89   | -1.40  | <0.05  |
| <i>Uncl.</i>                 |          |        |        |
| <i>Pasteurellaceae</i>       | 730.79   | 1.21   | <0.05  |
| <i>Uncl. Neisseriaceae</i>   | 122.52   | 1.26   | <0.05  |
| <i>Actinomyces</i>           | 705.72   | 0.95   | <0.05  |
| <i>Capnocytophaga</i>        | 147.16   | 1.04   | <0.1   |
| <i>Uncl. Veillonellaceae</i> | 116.32   | -1.03  | <0.1   |
| Moderate PD                  |          |        |        |
| <b>Neisseria</b>             | 318.72   | 2.80   | <0.01  |
| <i>Capnocytophaga</i>        | 231.37   | 2.19   | <0.01  |
| <i>Kingella</i>              | 200.13   | 2.40   | <0.05  |
| <i>Rothia</i>                | 1853.54  | 1.98   | <0.05  |
| <i>Uncl. Veillonellaceae</i> | 127.04   | -1.69  | <0.05  |
| <i>Peptostreptococcus</i>    | 11.91    | -1.84  | <0.1   |
| <i>Uncl.</i>                 |          |        |        |
| <i>Lachnospiraceae</i>       | 27.32    | -1.60  | <0.1   |
| <i>Actinomyces</i>           | 1312.19  | 1.24   | <0.1   |
| <i>Abiotrophia</i>           | 46.81    | 1.85   | <0.1   |
| Severe PD                    |          |        |        |
| <i>Uncl.</i>                 |          |        |        |
| <i>Pasteurellaceae</i>       | 443.22   | 2.20   | <0.01  |
| <i>Streptococcus</i>         | 2435.30  | -1.60  | <0.01  |
| <i>Leptotrichia</i>          | 449.75   | -1.81  | <0.05  |
| <b>Neisseria</b>             | 224.32   | 2.14   | <0.05  |

#

**Table S4.** Genus level significant changes in abundance associated with HIV infection (HIV+) fully strat and sampling site. Only differences with p.adj<0.1 and baseMean>100 are shown; log2FC (A vs B) refer

| Teeth                             | N-PD / HIV+ vs HIV- |             |                  | M-PD / HIV+ vs HIV- |             |                  | S-PD /        |
|-----------------------------------|---------------------|-------------|------------------|---------------------|-------------|------------------|---------------|
|                                   | baseMean            | log2FC      | padj             | baseMean            | log2FC      | padj             | baseMean      |
| <i>Neisseria</i>                  | <b>157.10</b>       | <b>2.53</b> | <b>&lt;0.1</b>   | <b>245.48</b>       | <b>2.26</b> | <b>&lt;0.05</b>  | N/S           |
| <i>Uncl. Bacillales</i>           | N/S                 | N/S         | N/S              | 62.30               | 7.17        | <0.001           | 53.12         |
| <i>Uncl. Pasteurellaceae</i>      | N/S                 | N/S         | N/S              | 479.55              | 3.82        | <0.001           | 313.17        |
| <i>Rothia</i>                     | N/S                 | N/S         | N/S              | 1062.17             | 4.38        | <0.001           | 381.39        |
| <i>Atopobium</i>                  | N/S                 | N/S         | N/S              | 22.70               | 2.36        | <0.05            | 17.70         |
| <i>Abiotrophia</i>                | N/S                 | N/S         | N/S              | 29.72               | 4.24        | <0.001           | 12.21         |
| <i>Granulicatella</i>             | N/S                 | N/S         | N/S              | 67.86               | 2.69        | <0.001           | N/S           |
| <b><i>Uncl. Neisseriaceae</i></b> | N/S                 | N/S         | N/S              | <b>139.94</b>       | <b>2.73</b> | <b>&lt;0.001</b> | N/S           |
| <i>Uncl. Lachnospiraceae</i>      | N/S                 | N/S         | N/S              | 22.68               | -2.90       | <0.001           | N/S           |
| <i>Kingella</i>                   | N/S                 | N/S         | N/S              | 165.33              | 2.47        | <0.05            | N/S           |
| <i>Uncl. Bacteria</i>             | N/S                 | N/S         | N/S              | 27.38               | -1.78       | <0.05            | N/S           |
| <i>Leptotrichia</i>               | N/S                 | N/S         | N/S              | 1001.86             | -1.78       | <0.05            | N/S           |
| <i>Centipeda</i>                  | N/S                 | N/S         | N/S              | 444.37              | -1.87       | <0.1             | N/S           |
| <i>Actinomyces</i>                | N/S                 | N/S         | N/S              | 1056.62             | 1.37        | <0.1             | N/S           |
| <i>Tannerella</i>                 | N/S                 | N/S         | N/S              | N/S                 | N/S         | N/S              | 19.02         |
| <i>Alloprevotella</i>             | N/S                 | N/S         | N/S              | N/S                 | N/S         | N/S              | 40.32         |
| <i>Porphyromonas</i>              | N/S                 | N/S         | N/S              | N/S                 | N/S         | N/S              | 187.29        |
| <b>Cheek</b>                      |                     |             |                  |                     |             |                  |               |
| <i>Neisseria</i>                  | <b>131.73</b>       | <b>2.07</b> | <b>&lt;0.005</b> | <b>286.98</b>       | <b>2.11</b> | <b>&lt;0.1</b>   | N/S           |
| <i>Uncl. Bacillales</i>           | N/S                 | N/S         | N/S              | 148.28              | 4.45        | <0.001           | 96.86         |
| <i>Abiotrophia</i>                | 49.00               | 1.95        | <0.05            | N/S                 | N/S         | N/S              | N/S           |
| <i>Uncl. Pasteurellaceae</i>      | 1842.13             | 1.29        | <0.1             | N/S                 | N/S         | N/S              | N/S           |
| <i>Capnocytophaga</i>             | 37.41               | 1.44        | <0.1             | N/S                 | N/S         | N/S              | N/S           |
| <i>Rothia</i>                     | 1342.50             | 1.42        | <0.1             | N/S                 | N/S         | N/S              | N/S           |
| <i>Uncl. Synergistaceae</i>       | N/S                 | N/S         | N/S              | 28.12               | -2.87       | <0.05            | N/S           |
| <i>Leptotrichia</i>               | N/S                 | N/S         | N/S              | 417.43              | -1.45       | <0.05            | N/S           |
| <i>Uncl. Veillonellaceae</i>      | N/S                 | N/S         | N/S              | 49.26               | -1.41       | <0.1             | N/S           |
| <i>Streptococcus</i>              | N/S                 | N/S         | N/S              | N/S                 | N/S         | N/S              | 3778.76       |
| <b>Saliva</b>                     |                     |             |                  |                     |             |                  |               |
| <b><i>Uncl. Neisseriaceae</i></b> | <b>514.63</b>       | <b>3.03</b> | <b>&lt;0.005</b> | N/S                 | N/S         | N/S              | <b>163.00</b> |
| # <i>Parvimonas</i>               | 13.83               | -2.03       | <0.1             | N/S                 | N/S         | N/S              | N/S           |

**Table S5.** Genus level significant changes in abundance associated with HIV infection (HIV+) stratified by severity of PD and adjusted for Age and Sexual Behavior. Only differences with  $p_{adj} < 0.1$  and  $baseMean > 100$  are shown; N/S: not significant;  $\log_2FC$  (A vs B) refers to  $\log_2(A/B)$ .#

| Global                            | baseMean | HIV+ vs HIV- |           | Sev/ModPD vs Mild/NonePD |           |
|-----------------------------------|----------|--------------|-----------|--------------------------|-----------|
|                                   |          | $\log_2FC$   | $p_{adj}$ | $\log_2FC$               | $p_{adj}$ |
| <b><i>Neisseria</i></b>           | 325.5    | 3.27         | <0.0001   | 1.15                     | <0.01     |
| <i>Selenomonas</i>                | 254.8    | -1.94        | <0.0001   | N/S                      | N/S       |
| <i>Uncl. Veillonellaceae</i>      | 160.1    | -1.91        | <0.0001   | N/S                      | N/S       |
| <i>Centipeda</i>                  | 199.8    | -1.82        | <0.001    | 0.83                     | <0.05     |
| <i>Uncl. Pasteurellaceae</i>      | 946.9    | 1.40         | <0.001    | -0.93                    | <0.01     |
| <b><i>Uncl. Neisseriaceae</i></b> | 137.6    | 1.47         | <0.01     | N/S                      | N/S       |
| <i>Leptotrichia</i>               | 687.3    | -1.01        | <0.05     | N/S                      | N/S       |
| <i>Prevotella</i>                 | 855.5    | -0.87        | <0.05     | N/S                      | N/S       |
| <i>Kingella</i>                   | 101.9    | 1.14         | <0.1      | N/S                      | N/S       |
| <i>Streptococcus</i>              | 4314.7   | N/S          | N/S       | -0.84                    | <0.01     |
| <i>Veillonella</i>                | 4169.0   | N/S          | N/S       | -0.86                    | <0.01     |
| <i>Rothia</i>                     | 1112.0   | N/S          | N/S       | -0.80                    | <0.05     |
| <i>Selenomonas</i>                | 254.8    | N/S          | N/S       | 0.91                     | <0.05     |
| <i>Granulicatella</i>             | 190.9    | N/S          | N/S       | -0.70                    | <0.05     |
| <i>Gemella</i>                    | 307.7    | N/S          | N/S       | -0.74                    | <0.05     |
| <b>Teeth</b>                      |          |              |           |                          |           |
| <b><i>Neisseria</i></b>           | 318.6    | 2.80         | <0.01     | N/S                      | N/S       |
| <i>Centipeda</i>                  | 396.9    | -2.41        | <0.01     | N/S                      | N/S       |
| <i>Selenomonas</i>                | 484.4    | -2.23        | <0.01     | N/S                      | N/S       |
| <i>Uncl. Veillonellaceae</i>      | 298.9    | -2.08        | <0.05     | N/S                      | N/S       |
| <i>Prevotella</i>                 | 645.4    | -1.22        | <0.05     | N/S                      | N/S       |
| <i>Uncl. Pasteurellaceae</i>      | 518.2    | 1.53         | <0.1      | N/S                      | N/S       |
| <i>Granulicatella</i>             | 101.5    | N/S          | N/S       | -1.37                    | <0.05     |
| <b>Cheek</b>                      |          |              |           |                          |           |
| <b><i>Neisseria</i></b>           | 325.4    | 4.07         | <0.0001   | 1.25                     | <0.05     |
| <i>Uncl. Pasteurellaceae</i>      | 1390.6   | 1.66         | <0.01     | -1.15                    | <0.01     |
| <i>Prevotella</i>                 | 453.8    | -0.92        | <0.05     | N/S                      | N/S       |
| <i>Selenomonas</i>                | 101.0    | N/S          | N/S       | 1.33                     | <0.01     |
| <i>Corynebacterium</i>            | 125.1    | N/S          | N/S       | 1.59                     | <0.01     |
| <i>Rothia</i>                     | 975.8    | N/S          | N/S       | -1.40                    | <0.01     |
| <i>Streptococcus</i>              | 7321.3   | N/S          | N/S       | -1.17                    | <0.01     |
| <i>Gemella</i>                    | 597.4    | N/S          | N/S       | -1.05                    | <0.05     |
| <i>Veillonella</i>                | 3593.8   | N/S          | N/S       | -0.84                    | <0.05     |
| <i>Granulicatella</i>             | 244.9    | N/S          | N/S       | -0.73                    | <0.1      |
| <b>Saliva</b>                     |          |              |           |                          |           |
| <b><i>Uncl. Neisseriaceae</i></b> | 285.4    | 2.12         | = 0.42    | N/S                      | N/S       |
| <b><i>Veillonella</i></b>         | 8770.3   | N/S          | N/S       | -1.04                    | <0.1      |

#
