# Supplementary material for: Oral microbiome in HIV-associated periodontitis
Source: PubMed Central journal article supplement — Medicine (Baltimore). 2017 Mar 24;96(12):e5821. doi: 10.1097/MD.0000000000005821 (PMC5371436; doi:10.1097/md.0000000000005821), 2017-03-24
Supplement: medi-96-e5821-s002.pdf [file medi-96-e5821-s002.pdf]

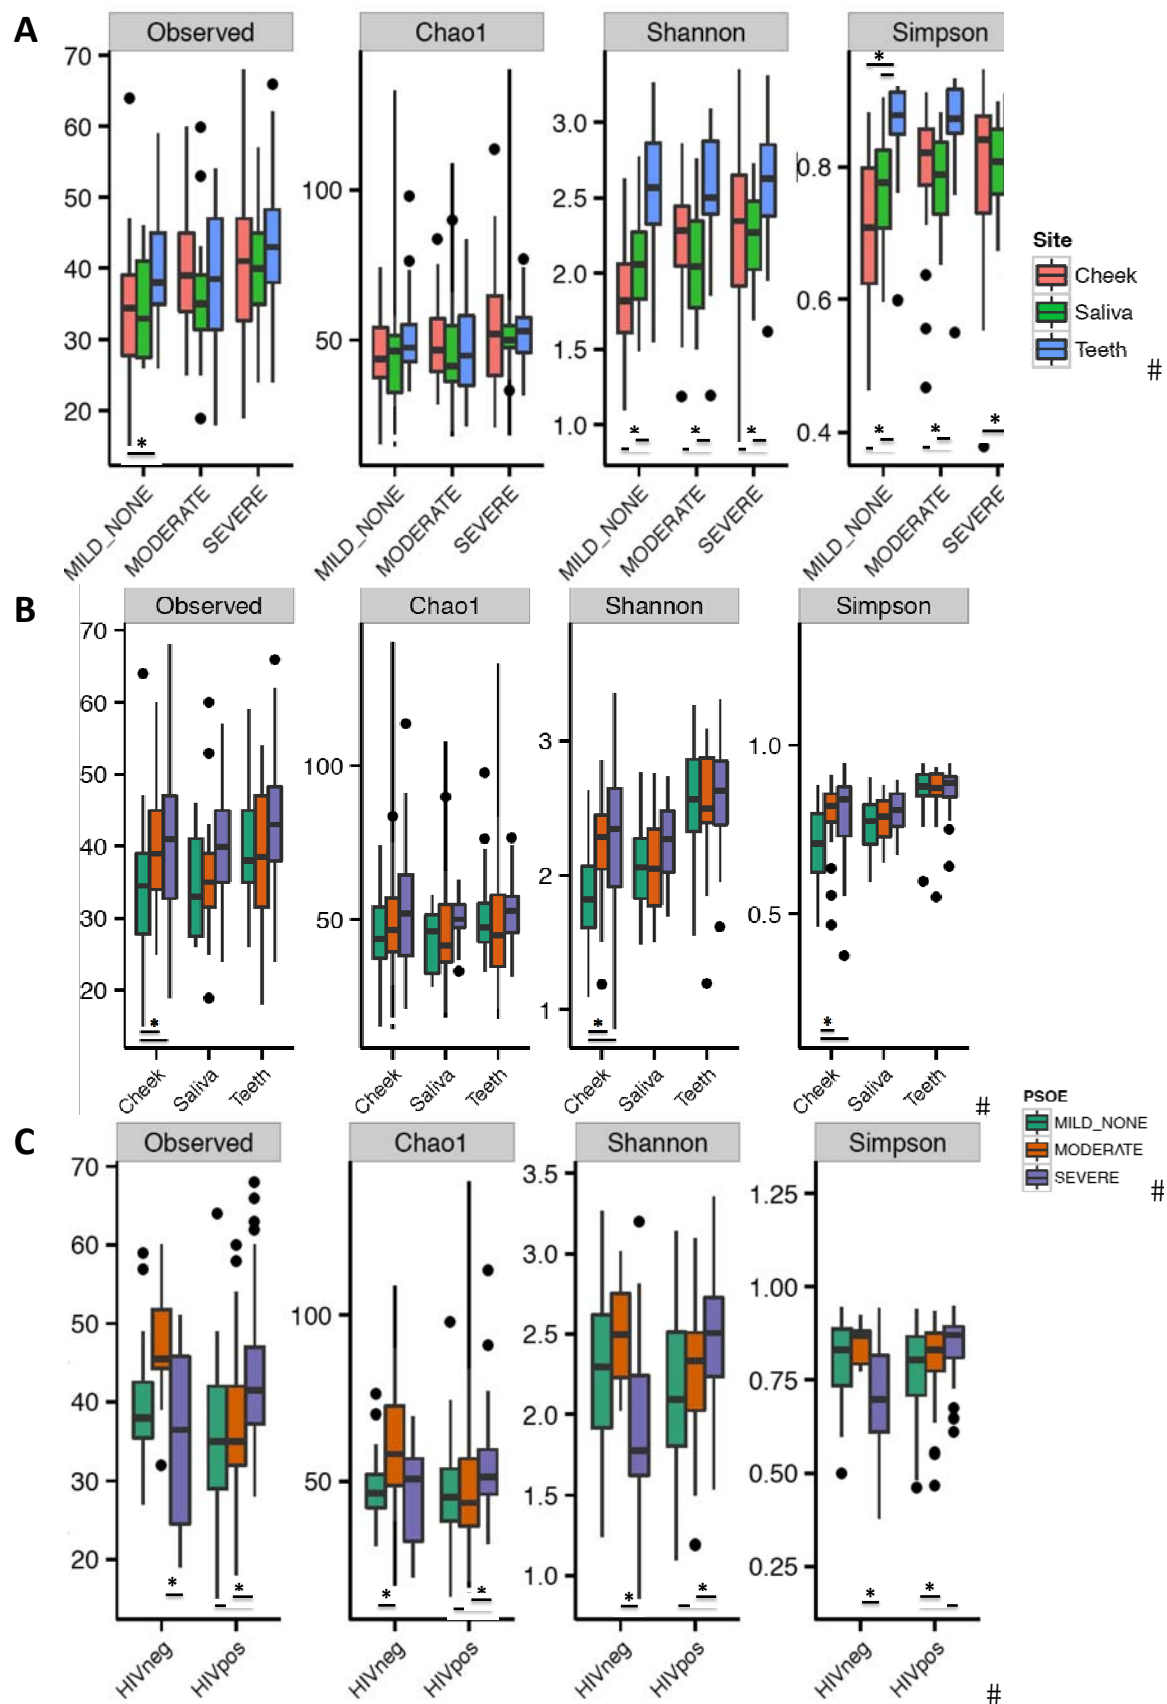

**Figure S1.** Richness (**Observed** species, **Chao1** indices) and Diversity (**Shannon** and **Simpson** indices) for different sampling sites by PD severity (**A**), PD severity by sampling site (**B**) and by PD and HIV infection status (**C**).

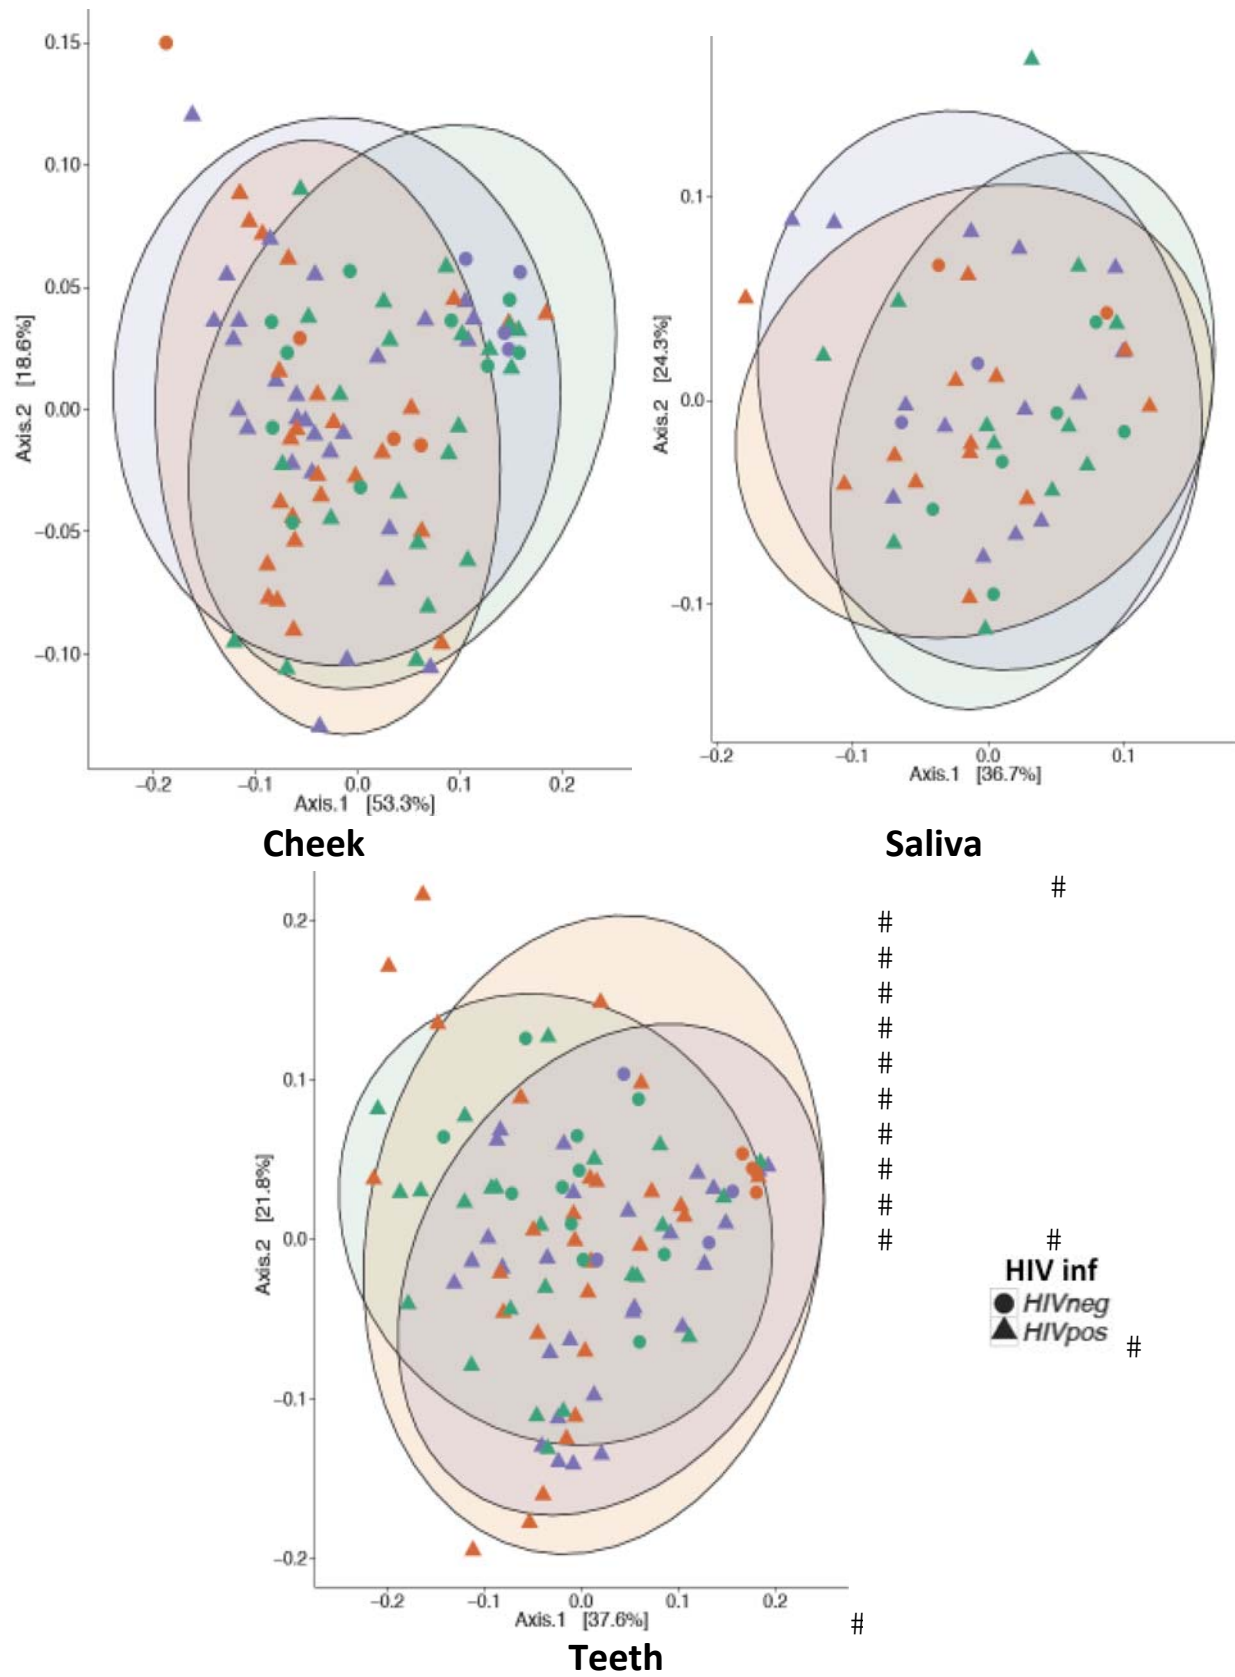

**Figure S2.** PCoA separate plots stratified by sampling site. No clustering is observed along different PD stages or HIV infection status when sampling sites are analyzed separately- #

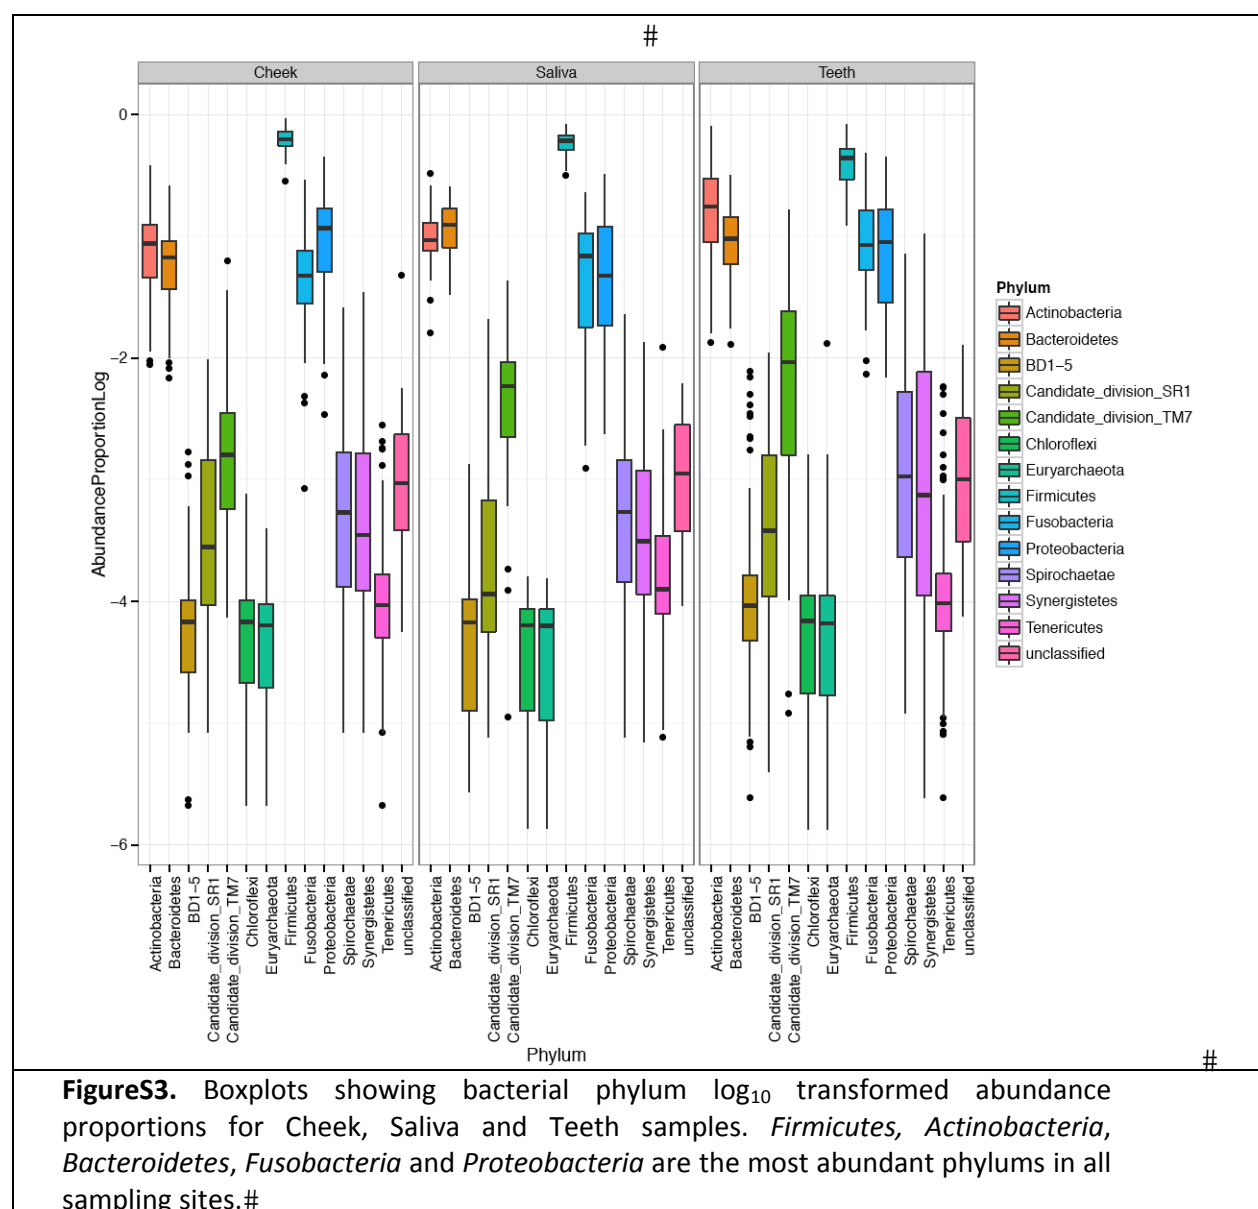

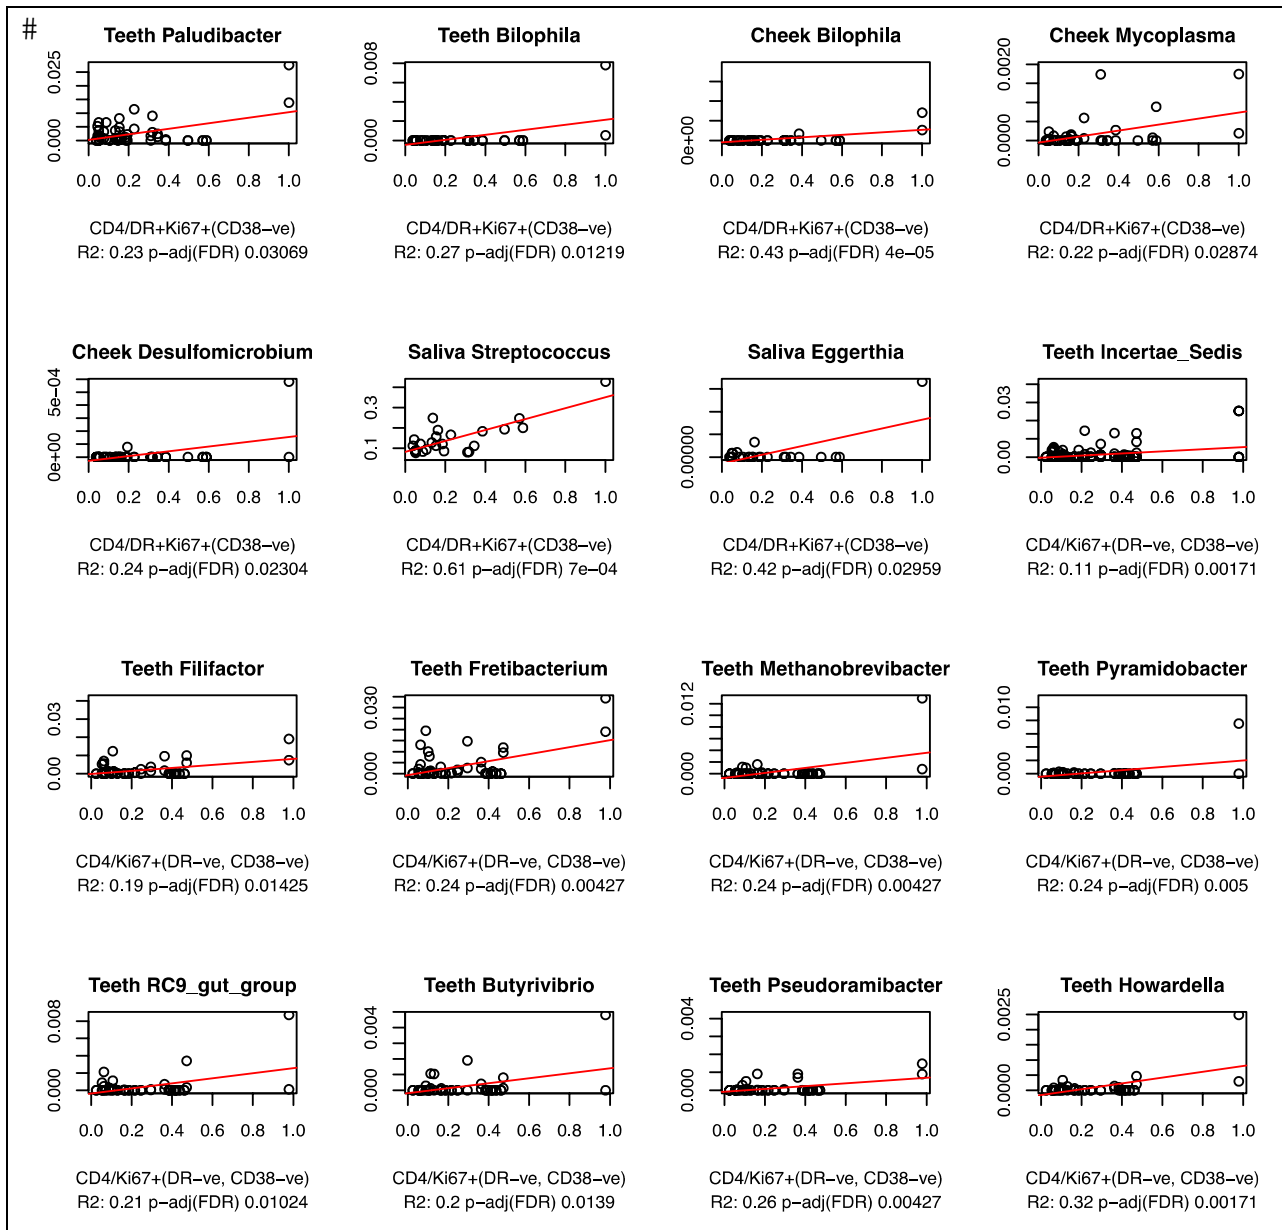

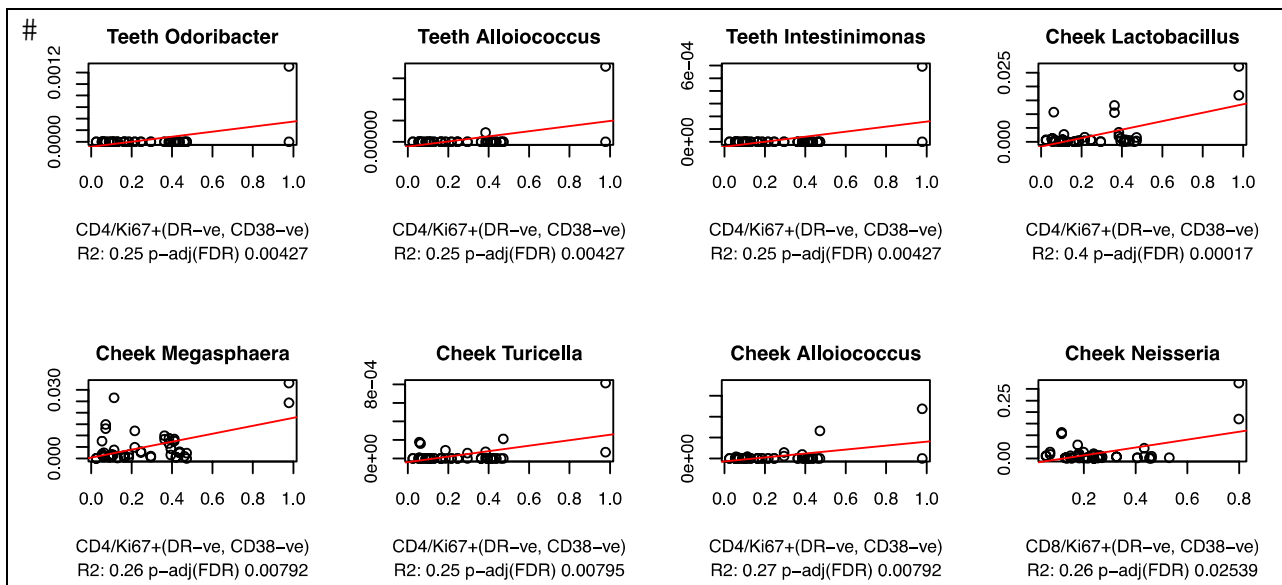

**Figure S4.** Scatter plots and for significant correlations between the different bacterial genera and immune markers. Note strong Streptococcus genus abundance and the DR+Ki67+(CD38-ve) immune markers.

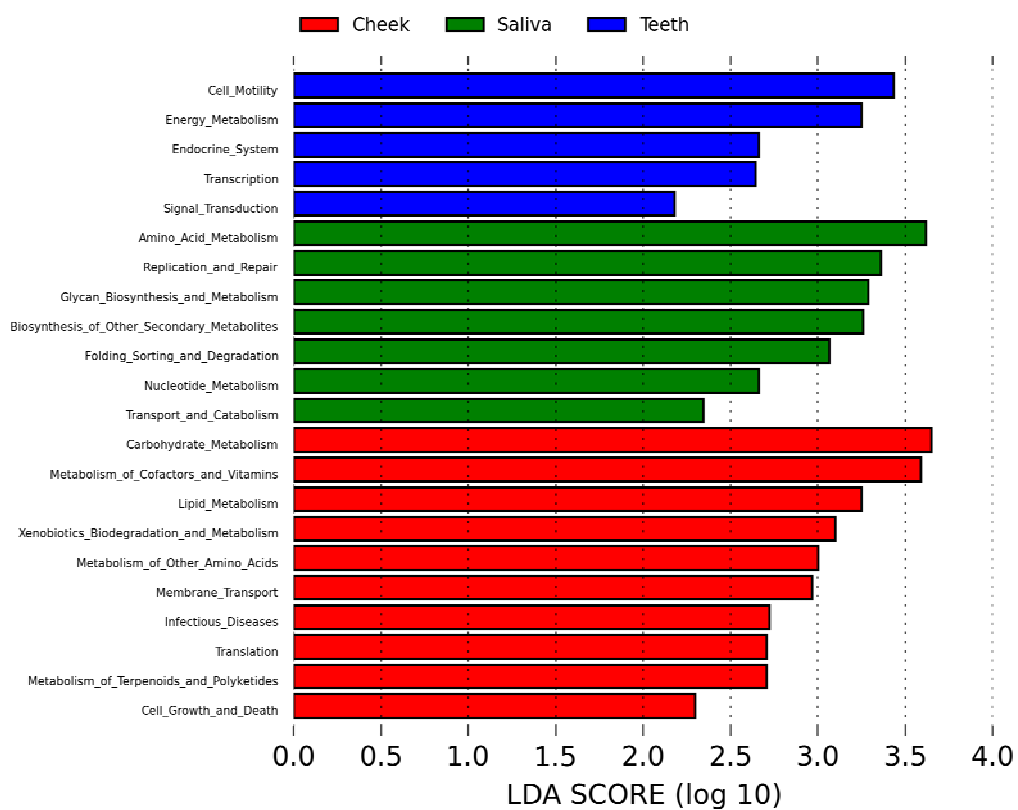

**Figure S5.** LDA scores for marker KEGG pathways enriched in each sampling site.

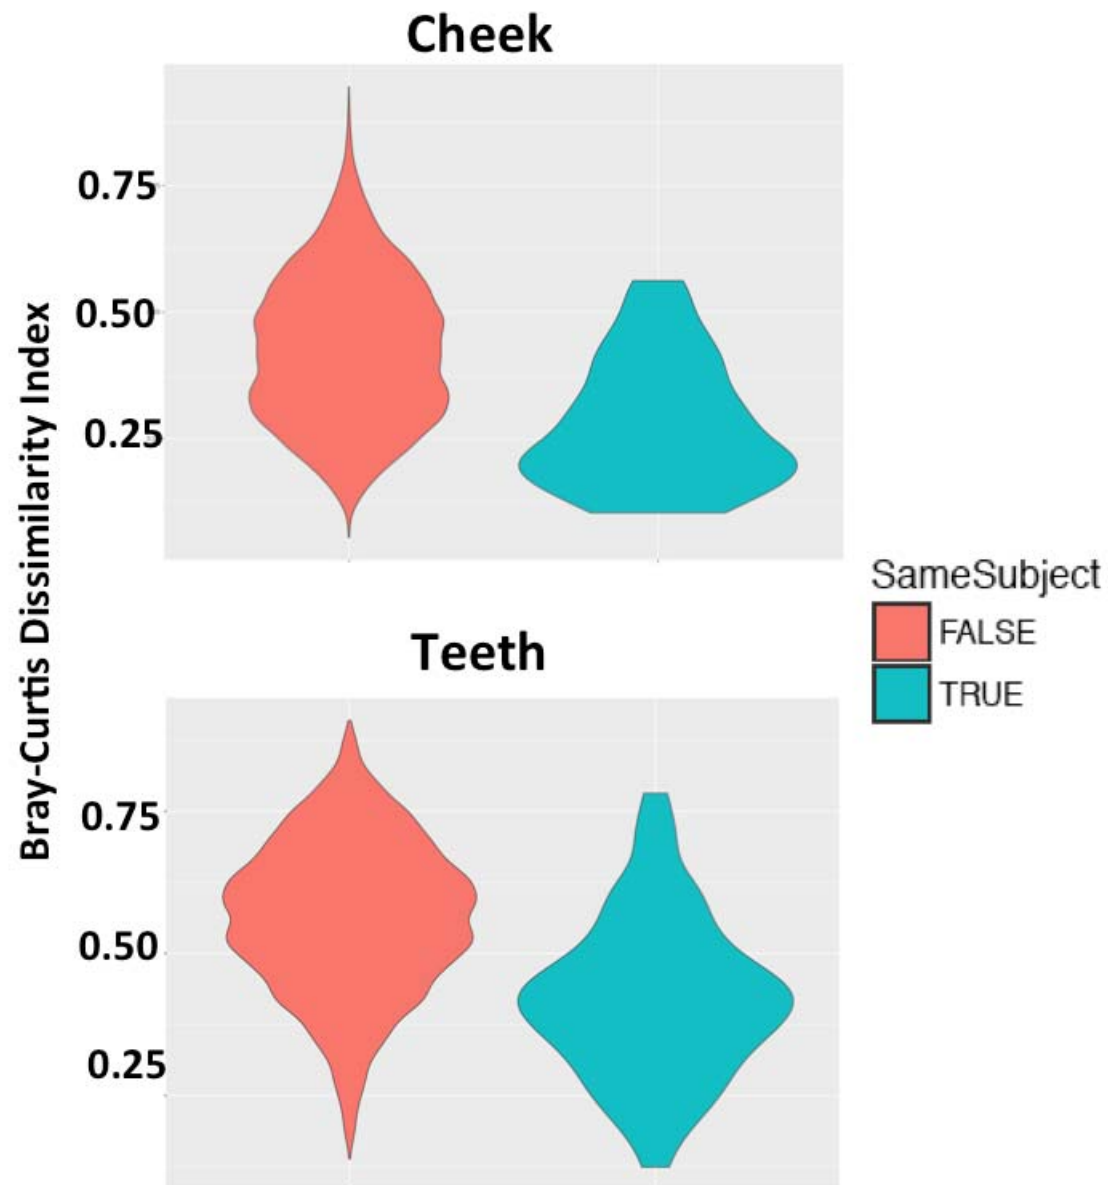

**Figure S6.** Bray-Curtis dissimilarity measures for inter and intra participant cheek (upper) and teeth (lower) samples. In both sampling sites, intra-participant samples show significantly greater similarity than inter-participant samples, while teeth samples show higher variability. #
